**Education, intelligence and Alzheimer's disease: Evidence from a multivariable two-sample Mendelian randomization study**

Emma L Anderson, research fellow<sup>1,2</sup>, Laura D Howe, reader<sup>1,2</sup>, Kaitlin H Wade, senior research associate<sup>1,2</sup>, Yoav Ben-Shlomo, professor<sup>2</sup>, W. David Hill, statistical geneticist<sup>3</sup>, Ian J Deary, professor<sup>3</sup>, Eleanor C Sanderson, senior research associate<sup>1,2</sup>, Jie Zheng, senior research associate<sup>1,2</sup>, Roxanna Korologou-Linden, research assistant<sup>1,2</sup>, Evie Stergiakouli, lecturer<sup>1,2,4</sup>, George Davey Smith, professor<sup>1,2</sup>, Neil M Davies, senior research fellow<sup>1,2\*</sup>, Gibran Hemani, senior research fellow<sup>2\*</sup>.

**\*Joint last authors with equal contributions**

<sup>1</sup> Medical Research Council Integrative Epidemiology Unit, Bristol Medical School, University of Bristol, UK.

<sup>2</sup> Population Health Sciences, Bristol Medical School, University of Bristol, UK.

<sup>3</sup> Centre for Cognitive Ageing and Cognitive Epidemiology, Department of Psychology, University of Edinburgh, Edinburgh, UK.

<sup>4</sup> School of Oral and Dental Sciences, University of Bristol, Bristol, UK.

**Corresponding Author:**

Dr Emma L Anderson

MRC Integrative Epidemiology Unit

Oakfield House, Oakfield Grove, Clifton

Bristol, UK

BS8 2BN

Tel: 01173 313414

Email: emma.louise.anderson@bristol.ac.uk

**Word Count:** 4323

1 **ABSTRACT**

2 **Objectives:** To examine whether educational attainment and intelligence have causal effects on risk  
3 of Alzheimer’s disease (AD), independently of each other.

4 **Design:** Two-sample univariable and multivariable Mendelian Randomization (MR) to estimate the  
5 causal effects of education on intelligence and vice versa, and the total and independent causal  
6 effects of both education and intelligence on risk of AD.

7 **Participants:** 17,008 AD cases and 37,154 controls from the International Genomics of Alzheimer’s  
8 Project (IGAP) consortium

9 **Main outcome measure:** Odds ratio of AD per standardised deviation increase in years of schooling  
10 and intelligence

11 **Results:** There was strong evidence of a causal, bidirectional relationship between intelligence and  
12 educational attainment, with the magnitude of effect being similar in both directions. Similar overall  
13 effects were observed for both educational attainment and intelligence on AD risk in the univariable  
14 MR analysis; with each SD increase in years of schooling and intelligence, odds of AD were, on  
15 average, 37% (95% CI: 23% to 49%) and 35% (95% CI: 25% to 43%) lower, respectively. There was  
16 little evidence from the multivariable MR analysis that educational attainment affected AD risk once  
17 intelligence was taken into account, but intelligence affected AD risk independently of educational  
18 attainment to a similar magnitude observed in the univariate analysis.

19 **Conclusions:** There is robust evidence for an independent, causal effect of intelligence in lowering  
20 AD risk, potentially supporting a role for cognitive training interventions to improve aspects of  
21 intelligence. However, given the observed causal effect of educational attainment on intelligence,  
22 there may also be support for policies aimed at increasing length of schooling to lower incidence of  
23 AD.

24 **INTRODUCTION**

25 Alzheimer's disease (AD) is the leading cause of death in England and Wales<sup>1</sup>. Existing treatments are  
26 currently unable to reverse or delay progression of the disease. Thus, strategies for reducing the  
27 incidence of the disease by intervening on modifiable risk factors are important. Higher educational  
28 attainment is associated with a lower risk of dementia<sup>2-5</sup>. However, the mechanisms underlying the  
29 associations of educational attainment with AD risk are uncertain and this has implications for  
30 intervention design. In particular, what is the role of intelligence? The degree to which education  
31 affects intelligence, versus intelligence being largely fixed in early life and acting as a determinant of  
32 educational attainment, has been debated for decades<sup>6-10</sup> and studies have provided evidence of an  
33 effect in both directions.<sup>8 11</sup> If the principal direction of causality is intelligence to educational  
34 attainment, intelligence would induce confounding bias in the association between educational  
35 attainment and AD. In this case, interventions aiming to increase educational attainment (e.g. raising  
36 the school leaving age to increase years of schooling) are unlikely to affect risk of AD, but alternative  
37 prevention strategies such as cognitive training may prove effective. In contrast, if the principal  
38 direction of causality is such that greater educational attainment increases intelligence (i.e.  
39 intelligence lies on the causal pathway from educational attainment to AD risk), then interventions  
40 designed to prolong the duration of education may reduce AD risk, either directly or indirectly  
41 through subsequently increasing intelligence.

42

43 Determining the relative contributions of education and intelligence to AD risk is of clear importance  
44 for designing appropriate policy interventions to reduce AD risk. Using observational methods to  
45 unpick these associations is challenging due to bias from measurement error, confounding and  
46 reverse causation. More recently, studies have attempted to estimate causal effects of educational  
47 attainment on AD risk using methods such as univariable Mendelian randomization (MR). MR is a  
48 form of instrumental variable analysis, in which genetic variants are used as proxies for a single  
49 environmental exposure<sup>12</sup>. Due to their random allocation at conception, genetic variants associated

50 with a particular risk factor are largely independent of potential confounders, that may otherwise  
51 bias the association of interest when using observational methods. Genetic variants also cannot be  
52 modified by subsequent disease, thereby eliminating potential bias by reverse causation. Thus, MR  
53 can be a useful tool for helping to establish whether the association between an exposure and an  
54 outcome is likely to be causal. However, these methods can be problematic with traits that are  
55 highly genetically and phenotypically correlated (such as educational attainment and intelligence)<sup>13</sup>  
56 <sup>14</sup>. Figure 1 illustrates possible models underlying the observed associations of educational  
57 attainment and intelligence with AD risk. In all models shown, causal effects for both exposures on  
58 AD risk would be implied from univariable MR analyses. However, depending on the underlying  
59 model, intervention targets will differ. Multivariable MR is an extension of univariable MR in which  
60 multiple exposures are included within the same model. It can estimate causal effects of one trait,  
61 independently of another related trait. Thus, extending MR analyses from the univariable to the  
62 multivariable setting may be a useful tool for further disentangling these relationships and  
63 establishing the respective roles of both education and intelligence in AD risk<sup>13</sup>. In this study, we  
64 estimated (i) the effect of educational attainment on intelligence and vice versa, (ii) the overall  
65 effects of educational attainment and intelligence on risk of AD and (iii) the independent effects of  
66 both education and intelligence on risk of AD (i.e. the effects of educational attainment and  
67 intelligence on AD risk that are independent of the other trait).

68

69

|                                                                                                                                                                                                      | Causal effect implied by univariable analysis | Causal effects identified in multivariable analyses | Intervention Target |
|------------------------------------------------------------------------------------------------------------------------------------------------------------------------------------------------------|-----------------------------------------------|-----------------------------------------------------|---------------------|
| <p>(a) EA has no causal effect on AD but confounding by IQ causes spurious association</p> <pre> graph TD     G --&gt; IQ     IQ --&gt; EA     IQ --&gt; AD     EA --&gt; AD         </pre>          | <p>IQ<br/>EA</p>                              | <p>IQ</p>                                           | <p>IQ</p>           |
| <p>(b) IQ has no causal effect on AD but confounding by EA causes spurious association</p> <pre> graph TD     G --&gt; EA     EA --&gt; IQ     EA --&gt; AD     IQ --&gt; AD         </pre>          | <p>IQ<br/>EA</p>                              | <p>EA</p>                                           | <p>EA</p>           |
| <p>(c) Causal effect of EA on AD is mediated through IQ</p> <pre> graph TD     G --&gt; EA     EA --&gt; IQ     IQ --&gt; AD         </pre>                                                          | <p>IQ<br/>EA</p>                              | <p>IQ</p>                                           | <p>IQ<br/>EA</p>    |
| <p>(d) Causal effect of IQ on AD is mediated through EA</p> <pre> graph TD     G --&gt; IQ     IQ --&gt; EA     EA --&gt; AD         </pre>                                                          | <p>IQ<br/>EA</p>                              | <p>EA</p>                                           | <p>IQ<br/>EA</p>    |
| <p>(e) No causal effect of EA on AD but spurious association induced by horizontal pleiotropic pathway through IQ</p> <pre> graph TD     G --&gt; IQ     G --&gt; EA     IQ --&gt; AD         </pre> | <p>IQ<br/>EA</p>                              | <p>IQ</p>                                           | <p>IQ</p>           |
| <p>(f) No causal effect of IQ on AD but spurious association induced by horizontal pleiotropic pathway through EA</p> <pre> graph TD     G --&gt; IQ     G --&gt; EA     EA --&gt; AD         </pre> | <p>IQ<br/>EA</p>                              | <p>EA</p>                                           | <p>EA</p>           |
| <p>(g) No causal effect of EA or IQ on AD but G has an independent causal effect on all three traits</p> <pre> graph TD     G --&gt; AD     G --&gt; IQ     G --&gt; EA         </pre>               | <p>IQ<br/>EA</p>                              | <p>-</p>                                            | <p>-</p>            |
| <p>(h) Joint independent causal effects of both EA and IQ on AD</p> <pre> graph TD     G --&gt; IQ     G --&gt; EA     IQ &lt;--&gt; EA     IQ --&gt; AD     EA --&gt; AD         </pre>             | <p>IQ<br/>EA</p>                              | <p>IQ<br/>EA</p>                                    | <p>IQ<br/>EA</p>    |

70 **Figure 1. A non-exhaustive list of possible models underlying the observed causal effects of educational**  
 71 **attainment, intelligence and risk of Alzheimer’s disease.** Please note that these are not intended to be  
 72 directed acyclic graphs. IQ denotes intelligence. EA denotes educational attainment and AD denotes  
 73 Alzheimer’s Disease. G denotes a set of instruments, which are drawn as a single node for visual simplicity.  
 74 Panel (a) illustrates a model in which G is identified in a genome wide association study of EA, because it is

75 associated with EA indirectly through IQ. IQ has an independent effect on AD but EA does not. A spurious  
76 association between EA and AD is induced due to confounding by IQ. Accounting for IQ in multivariable  
77 analysis would reveal no independent effect of EA on AD risk and the intervention target should be IQ. Panel  
78 (b) illustrates a model in which G is identified in a genome wide association study of IQ because it is associated  
79 with IQ indirectly through EA. EA has an independent effect on AD but IQ does not. A spurious association  
80 between IQ and AD is induced due to confounding by EA. Accounting for EA in multivariable analysis would  
81 reveal no independent effect of IQ on AD risk and the intervention target should be EA. Panel (c) illustrates a  
82 model in which the effect of EA on AD risk is entirely mediated by IQ (i.e. IQ lies on the causal pathway  
83 between EA and AD). Multivariable analyses would reveal an independent effect of IQ on AD risk, but no  
84 independent effect of EA. The intervention target could be either IQ or EA. Panel (d) illustrates a model in  
85 which the effect of IQ on AD risk is entirely mediated by EA (i.e. EA lies on the causal pathway between IQ and  
86 AD). Multivariable analyses would reveal an independent effect of EA on AD risk, but no independent effect of  
87 IQ. The intervention target could be either EA or IQ. Panel (e) illustrates a model in which there is full  
88 horizontal pleiotropy through IQ. Horizontal pleiotropy occurs when G has a causal effect on disease  
89 independently of its effect on the exposure. In this case, multivariate analyses would reveal an independent  
90 effect of IQ on AD risk, but no independent effect of EA and the intervention target should be IQ. Panel (f)  
91 illustrates a model in which there is full horizontal pleiotropy through EA. Multivariate analyses would reveal  
92 an independent effect of EA on AD risk, but no independent effect of IQ and the intervention target should be  
93 EA. Panel G illustrates a model in which G independently effects all three traits, but the three traits have no  
94 causal effect on each other. Multivariable analysis would show no independent effects of EA or IQ on AD risk.  
95 Panel (h) illustrates a model in which there are joint independent effects of both EA and IQ on AD risk.  
96 Multivariate analysis would show independent effects of both IQ and EA and the intervention target could be  
97 either IQ or EA. Here, the bi-directional relationship between IQ and EA does not affect the qualitative  
98 interpretation.

99

## 100 **METHODS**

### 101 **Mendelian Randomization**

102 MR is a form of instrumental variable analysis that uses genetic variants to proxy for environmental  
103 exposures. Two-sample MR<sup>15</sup> is an extension in which the effects of the genetic instrument on the  
104 exposure and on the outcome are obtained from separate genome-wide association studies (GWAS).  
105 This method is particularly useful for trying to identify early life risk factors for later life diseases like  
106 AD, because unlike in observational studies, rich longitudinal data across the whole life course  
107 (which are scarce) are not needed. MR is based on three key assumptions: (i) genetic variants must  
108 be robustly associated with the exposure of interest, (ii) genetic variants must not be associated with  
109 potential confounders of the association between the exposure and the outcome and (iii) there must  
110 be no effects of the genetic variants on the outcome, that do not go via the exposure (i.e. no  
111 horizontal pleiotropy)<sup>16</sup>. To-date, MR studies have typically been univariable (i.e. examining the  
112 effect of one exposure on an outcome), thereby estimating the total effect of the exposure on the  
113 outcome through all possible pathways. More recently, multivariable MR methods have been  
114 proposed to investigate the independent effects of multiple traits on an outcome. Methods for  
115 conducting a multivariable MR analysis have been published elsewhere<sup>13 17 18</sup>.

### 116 **Data**

117 For educational attainment, we used the GWAS (discovery and replication meta-analysis,  
118  $n=293,723$ )<sup>19</sup> which identified 162 approximately independent genome-wide significant ( $p<5\times 10^{-8}$ )  
119 single nucleotide polymorphisms (SNPs) associated with years of schooling. SNP coefficients were  
120 per standard deviation (SD) units of years of schooling (SD=3.6 years). For intelligence, we used the  
121 largest ( $n=248,482$ ) and most recent iteration of the Multi-Trait Analysis of Genome-wide  
122 association studies<sup>20</sup>, which identified 194 approximately independent ( $r^2$  threshold  $<0.01$  within a  
123 10mb window using 1000 genomes reference panel<sup>21</sup>) genome-wide significant SNPs. SNP  
124 coefficients were per one SD increase in the intelligence test scores. F statistics provide an indication  
125 of instrument strength<sup>22</sup> and are a function of  $R^2$  (how much variance in the trait is explained by the

126 set of genetic instruments being used), the number of instruments being used and the sample size.  
127 The F statistics for the educational attainment and intelligence instruments are 43.5 and 50.45,  
128 respectively ( $F > 10$  indicates the analysis is unlikely to suffer from weak instrument bias)<sup>23</sup>. For the  
129 outcome (AD) we used the large-scale GWAS of AD conducted by the International Genomics of  
130 Alzheimer's Project (IGAP,  $n=17,008$  AD cases and 37,154 controls)<sup>24</sup>. SNP coefficients were log odds  
131 ratios of AD. Ethical approval was granted for each of the original GWAS studies and details can be  
132 found in the respective publications.

### 133 **Estimating the bidirectional association between intelligence and educational attainment**

134 After (i) excluding non-independent SNPs (ii) excluding SNPs that overlapped between the two  
135 GWAS and (iii) harmonization across both GWAS, there were 148 genome-wide significant SNPs for  
136 educational attainment and 180 for intelligence available for these analyses. Full details of the  
137 harmonization procedure are provided in the online supplement. Univariable MR was used to  
138 estimate the total effect of intelligence on educational attainment, and educational attainment on  
139 intelligence. This was done using inverse-variance-weighted (IVW) regression analysis<sup>25</sup>. Briefly, IVW  
140 regression is where causal effect estimates for each genetic variant are averaged using an inverse-  
141 variance weighted formula (taken from the meta-analysis literature) to provide an overall causal  
142 estimate of the exposure on the outcome<sup>26</sup>. In this regression, the intercept is constrained to zero,  
143 which makes the assumption of no horizontal pleiotropy. Results are presented in SD units to enable  
144 a comparison of the magnitude of effect across both exposures.

### 145 **Estimating the total and independent effects of education and intelligence on Alzheimer's disease**

146 There were 142 genome-wide significant SNPs for educational attainment and 185 for intelligence  
147 available for these analyses, after excluding non-independent SNPs and harmonization across both  
148 GWAS (full details of harmonization in online supplement). Univariable MR was used to estimate the  
149 total effects of both intelligence and educational attainment (separately) on risk of AD, through all  
150 possible pathways, using in an inverse-variance-weighted (IVW) regression analysis (described



151 above)<sup>25</sup>. As mentioned previously, this univariable method has been shown to yield biased effect  
152 estimates if the genetic instruments being used are non-specific for the hypothesised exposure.<sup>13 14</sup>  
153 Thus, to demonstrate these effects as they would be observed in a typical univariable analyses, we  
154 did not exclude the 9 SNPs that overlapped across education and intelligence GWAS. We then used  
155 multivariable MR to estimate the independent effects of both educational attainment and  
156 intelligence on risk of AD, by including both exposures within the same model<sup>13</sup>. After clumping the  
157 full list of SNPs from both the education and intelligence GWAS (to ensure only independent SNPs  
158 are included) and restricting to those SNPs (or proxies) found in the AD GWAS, a total of 231 SNPs  
159 were available for the multivariable MR analyses (84 for education and 156 for intelligence, 9 of  
160 which overlap between both GWAS).

#### 161 **Sensitivity analyses**

162 Firstly, in the bidirectional analysis between educational attainment and intelligence, we  
163 endeavoured to rule out the possibility that the genetic instruments used to proxy for educational  
164 attainment are actually instruments for intelligence and vice versa (i.e. we wanted to test that the  
165 hypothesised causal direction was correct for each SNP used). To do this we performed Steiger  
166 filtering<sup>27</sup> for each SNP to examine whether it explains more variance in the exposure than it does in  
167 the outcome (which should be true if the hypothesised causal direction from exposure to outcome is  
168 correct). We then re-ran analyses excluding those SNPs for which there was evidence that it  
169 explained more variance in the outcome than the exposure. Secondly, to check that the SNPs do not  
170 exert a direct effect on the outcome apart from through the exposure (which would violate a key MR  
171 assumption of no horizontal pleiotropy<sup>12</sup>), we compared results from all univariable (both the  
172 bidirectional education on intelligence analyses and the analysis of education and intelligence on AD  
173 risk) and multivariable IVW regressions to those obtained with MR-Egger regression. In MR-Egger  
174 regression, the intercept is not constrained to zero, thus, the assumption of no horizontal pleiotropy  
175 is relaxed.<sup>16 26 28</sup> The estimated value of the intercept in MR-Egger regression can be interpreted as  
176 an estimate of the average pleiotropic effect across the genetic variants. An intercept term that

177 differs from zero is therefore indicative of horizontal pleiotropy, and the causal effect estimate  
178 obtained from an MR-Egger regression is adjusted for the degree of pleiotropy detected.<sup>16</sup> Full  
179 details of the MR-Egger regression analyses are provided in the online supplement. Thirdly, we  
180 conducted a leave-one-out analysis for the univariable models in which we systematically removed  
181 one SNP at a time to assess the influence of potentially pleiotropic SNPs on the causal estimates<sup>29</sup>. If  
182 any single SNP was invalid, there would likely be distortion in the distribution of the causal effects  
183 estimates. Fourth, in all univariable analysis, we assessed whether causal estimates from different  
184 genetic variants were comparable (i.e. heterogeneity) using Cochran's Q statistic<sup>16</sup>. Considerable  
185 heterogeneity would imply that the MR assumptions may not be valid for all the variants included in  
186 the analysis. Finally, funnel plots were generated to enable the visual assessment of the extent to  
187 which pleiotropy is balanced across the set of instruments used in each analysis. Symmetry in these  
188 plots provides evidence against directional pleiotropy.

## 189 **RESULTS**

### 190 **Bidirectional effects of intelligence on educational attainment, and their influences on AD risk**

191 Using 180 and 148 genetic instruments for intelligence and educational attainment, respectively  
192 (and no overlapping SNPs), we found strong evidence of causal effects both of intelligence on  
193 educational attainment, and of educational attainment on intelligence (Table 1). However, the  
194 magnitude of the effect was over two-fold greater for educational attainment on intelligence  
195 compared with intelligence on educational attainment.

196

197 **Table 1: Bidirectional effect of intelligence on years of schooling**

| <b>Total effects</b>               | <b>Causal effect estimates</b> |                                                     |          |
|------------------------------------|--------------------------------|-----------------------------------------------------|----------|
|                                    | <b>N SNPs</b>                  | <b>Standardised <math>\beta</math><br/>(95% CI)</b> | <b>P</b> |
| Intelligence on years of schooling | 180                            | 0.51 (0.49, 0.54)                                   | 1.77e-95 |
| Years of schooling on intelligence | 148                            | 1.04 (0.99, 1.10)                                   | 9.36e-80 |

198 SNP – single nucleotide polymorphism.  $\beta$  – beta coefficient. CI – confidence interval. Results are  
199 interpreted per one standard deviation increase years of schooling and intelligence test scores.

200

201 The main IVW regression using all SNPs from the educational attainment GWAS showed that, with  
202 each SD more years of schooling (i.e. ~3.6 years), the odds of AD were, on average, 37% lower (95%  
203 CI: 23% to 49%). Per one SD higher intelligence test score, the odds of AD were, on average, 35%  
204 lower (95% CI: 25% to 43%, Figure 2 and Table C of the online supplement).

205 **Multivariable analysis of education and intelligence on AD**

206 When both intelligence and educational attainment were included within a single multivariable  
207 model, there was little evidence of an effect of educational attainment on AD risk, independent of  
208 intelligence (Figure 2 and Table C of the online supplement). There was, however, evidence that  
209 higher intelligence lowers risk of AD, independently of educational attainment. On average, after  
210 accounting for educational attainment, odds of AD were 38% lower (95% CI: 12% to 56%) per one SD  
211 higher intelligence test score (Figure 2 and Table C of the online supplement).

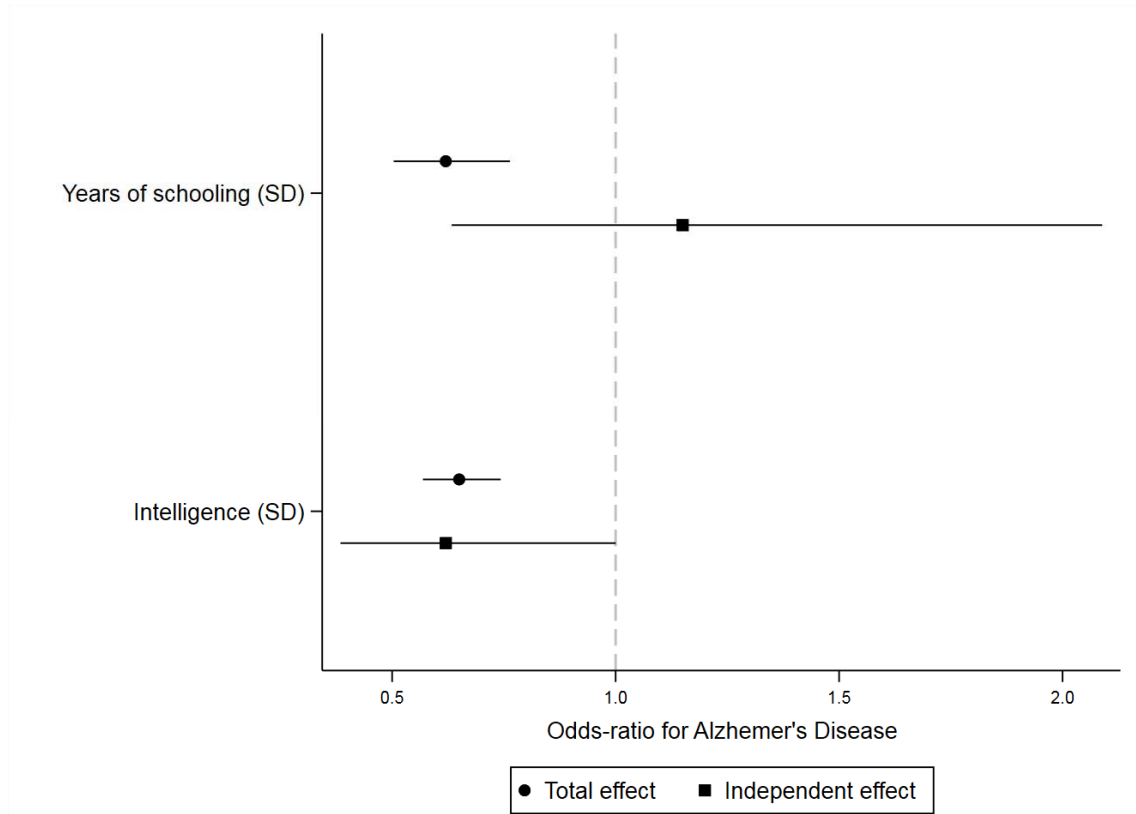

212  
213 **Figure 2: Forest plot showing (i) total effect estimates for years of schooling (in standard deviations)**  
214 **and intelligence (in standard deviations) on odds of AD and (ii) independent effect estimates for both**  
215 **years of schooling and intelligence on odds of AD, when each exposure is adjusted for the other.**

## 216 **Sensitivity analyses**

217 The Steiger filtering provided evidence that all intelligence SNPs explained more variance in  
218 intelligence than educational attainment, suggesting they were all in the correct causal direction (i.e.  
219 from intelligence to education). However, there was evidence that 125 (85%) of the 148 education  
220 SNPs explained more variance in intelligence than educational attainment, suggesting the  
221 hypothesised causal direction is incorrect and is more likely to go from intelligence to education. This  
222 left 23 education SNPs. When using only these 23 education SNPs, there was still strong evidence of  
223 a causal effect of educational attainment on intelligence (standardised  $\beta = 0.57$ , 95% CI: 0.48 to 0.66,  
224 Table A of the online supplement), but the magnitude attenuated so that it was comparable to the  
225 effect of intelligence on educational attainment (as opposed to the main analysis which showed over  
226 2-fold greater magnitude of effect for education on intelligence than vice versa). There was some  
227 evidence of horizontal pleiotropy only in the estimate of the total effect of intelligence on AD risk  
228 (Tables B and C of the online supplement). However, for all univariable and multivariable analyses  
229 (including the bidirectional effects of intelligence on educational attainment), MR-Egger effect  
230 estimates adjusting for pleiotropy were consistently comparable to those from the IVW regressions  
231 (Tables B and C of the online supplement). As expected the standard errors were much larger for  
232 MR-Egger estimates, because MR-Egger regression provides estimates of two parameters (i.e. both  
233 an intercept and a slope) compared to the single parameter in the IVW regressions (i.e. only the  
234 slope). The MR-Egger estimate for the total effect of intelligence on risk of AD went in the opposite  
235 direction to the IVW estimate (i.e. greater rather than lower odds of AD per SD increase in the  
236 intelligence score); however, the confidence intervals were very wide, and the effect estimate could  
237 plausibly go in either direction (OR: 1.36, 95% confidence interval: 0.75, 2.48). There was no  
238 distortion in the leave-one-out plots for univariable analyses (Figures A to D), suggesting that no  
239 single SNP was driving the observed effect from any analysis. There was evidence of heterogeneity in  
240 the causal effect estimates from all univariable analyses (P values for all analyses  $< 0.02$ , Tables B and  
241 C of the online supplement). However, provided the pleiotropic effects of genetic variants are

242 equally likely to be positive or negative (i.e. no directional pleiotropy), the overall causal estimate  
243 based on all genetic variants is likely to be unbiased and the funnel plots showed little evidence of  
244 departure from symmetry (Supplemental figures E to H).

## 245 **DISCUSSION**

### 246 **Bidirectional causal effects in the relationship between of educational attainment and intelligence**

247 In this study we examined the bidirectional effects of intelligence on educational attainment. We  
248 found that the relationship between intelligence and educational attainment is indeed likely to be  
249 bidirectional in nature (i.e. there is evidence of an effect in both directions), with the magnitude of  
250 effect being similar in both directions after filtering SNPs to check they are instrumenting the correct  
251 exposure. A recent meta-analysis of quasi-experimental studies of educational effects on intelligence  
252 provides evidence that support our MR findings. Across 142 effect sizes from 42 data sets involving  
253 over 600,000 participants, the authors reported consistent evidence for beneficial effects of  
254 education on cognitive abilities of approximately one to five IQ points (contingent on study design,  
255 inclusion of moderators, and publication-bias correction) for an additional year of education<sup>11</sup>. These  
256 findings are similar to ours in respect to magnitude of effect. Assuming a SD of 15 for IQ (as  
257 described in the meta-analysis<sup>11</sup>), intelligence was, on average, up to one-third of a SD higher per  
258 year of schooling. In our study we show an average of 0.57 SD higher in intelligence per SD (or. 3.6  
259 years) increase in years of schooling, which equates to 0.16 SD higher intelligence per one additional  
260 year of schooling. It is worth noting that in the quasi-experimental policy reform studies, levels of  
261 prior intelligence (or underlying general cognitive ability) will be similar among individuals who left  
262 school before and after the policy reforms, making confounding by prior intelligence unlikely.  
263 Similarly, in the MR analyses, we endeavoured to exclude any SNPs for education for which there  
264 was evidence that they explained more variance in intelligence than education, making it unlikely  
265 that our findings for the effect of education on intelligence are a result of all genetic instruments  
266 being associated with intelligence and not educational attainment. Thus, both genetic and non-

267 genetic instruments (which contain different sources of bias) provide consistent evidence that  
268 educational attainment affects later intelligence. The underlying mechanisms by which educational  
269 attainment improves intelligence are uncertain, but several hypotheses have been proposed  
270 including the teaching of material directly relevant to the intelligence tests, the training of thinking  
271 styles such as abstract reasoning, and the instilling of concentration and self-control<sup>30</sup>. It is also  
272 established that learning increases the strength of synaptic connections between neurons in grey  
273 matter<sup>31 32</sup>, and human brain imaging has revealed structural changes in white matter after learning  
274 complex tasks<sup>33 34</sup>.

275

276 Longitudinal observational studies have previously reported associations between early-life  
277 intelligence and educational attainment<sup>8</sup>. However, we are unaware of any longitudinal studies that  
278 have compared the magnitude of effect for baseline intelligence on educational attainment, with  
279 educational attainment on subsequent intelligence in the same sample. One previous study has  
280 examined the association between education and lifetime cognitive change after controlling for  
281 childhood IQ. The authors reported that (after controlling for childhood IQ score) education was  
282 positively associated with IQ at ages 70 and 79 (with the two outcome ages being in different  
283 samples), and more strongly for participants with lower initial IQ scores. Education, however,  
284 showed no significant association with processing speed, measured at ages 70 and 83 (again, with  
285 the two ages being in different samples)<sup>35</sup>. Another study examined associations between father's  
286 occupation, childhood cognition, educational attainment, own occupation in the 3rd decade, and  
287 self-reported literacy and numeracy problems in the 4th decade in the 1946 and 1958 Birth  
288 Cohorts<sup>36</sup>. The authors report inverse associations between childhood cognition, educational  
289 attainment and adult literacy and numeracy problems. Some studies have looked at genetic overlap  
290 between the two traits<sup>20 37</sup> and reported correlations of up to 0.7<sup>20 38</sup> but to date, none have  
291 explicitly tried to examine the direction of the association using genetic variants that are associated



292 with each of them. As mentioned previously, the largest and most robust evidence to date comes  
293 from a recent meta-analysis of quasi-experimental studies of educational effects on intelligence.<sup>11</sup>

#### 294 **Effects of educational attainment and intelligence on AD risk**

295 In addition to assessing the bidirectional causal effects in the relationship between educational  
296 attainment and intelligence, we also examined the total and independent effects of these traits on  
297 risk of AD. Our findings imply that the existing associations reported in the literature between  
298 greater educational attainment and lower AD risk are likely to be largely driven by intelligence,  
299 rather than there being an independent protective effect of staying in school for longer. This  
300 provides evidence against the underlying models illustrated panels (b), (d), (f) and (h) in Figure 1 (i.e.  
301 models in which there is an independent effect of educational attainment on AD risk). There are  
302 then four main possible explanations for our finding. The first is that prior intelligence is a  
303 confounder and induces a spurious association between education and AD risk (i.e. panel (a) in  
304 Figure 1). However, given the evidence supporting an effect of education on later intelligence from  
305 instrumental variable analyses using policy reforms to increase the school leaving age (in which prior  
306 intelligence is randomly distributed among instrument arms and thereby cannot confound), the  
307 model in panel (a) is unlikely. The second and third explanations relate to horizontal pleiotropy  
308 (either a pathway through IQ as in panel (e) or G independently effecting all traits as in panel (g)).  
309 Given our causal effect estimates were comparable when using methods to quantify and adjust for  
310 horizontal pleiotropy, these models are also unlikely to fully explain our findings. The fourth  
311 explanation is that there is an effect of educational attainment on AD risk, but it is largely mediated  
312 by its effects on later intelligence (i.e. panel (c)). Given the existing evidence supporting an effect of  
313 education on later intelligence from quasi-experimental studies<sup>11</sup>, and from our own MR analyses,  
314 this explanation seems most plausible.

315

316 Together, these findings suggest that increasing education attainment (for example, by increasing  
317 years of schooling) may have beneficial consequences for future AD incidence. As such, they offer

318 support to the most recent change in school policy in the United Kingdom (in 2013), which now  
319 requires young people to remain in at least part-time education until age 18 years (as opposed to 16  
320 years). Our findings also suggest that there may potentially be other ways of reducing risk of AD by  
321 improving various aspects of intelligence (e.g. with cognitive training), which may be particularly  
322 effective in those with lower educational attainment or in populations where increasing years of  
323 schooling is not feasible (e.g. older populations). However, it is worth noting that it is not clear  
324 what type of training (if any) would be beneficial (i.e. memory tasks, abductive reasoning tasks,  
325 creative tasks) or when in the life course (and indeed disease course) such training would confer  
326 protection (e.g. completing training earlier in life, versus much later but prior to onset of preclinical  
327 disease, versus throughout early disease stages).

328

329 Our findings are consistent with the 'brain reserve' and the 'cognitive reserve' hypotheses. Brain  
330 reserve refers to structural differences in the brain itself that may increase tolerance of pathology.  
331 Cognitive reserve refers to differences in the ability to tolerate and compensate for the effects of  
332 brain atrophy, using pre-existing cognitive-processing approaches or compensatory mechanisms<sup>39</sup>. In  
333 support of this, higher levels of education have been shown to be associated with whole brain and  
334 ventricular volume as well as cortical thickness<sup>40-42</sup>. However, it is important to note that these  
335 studies often do not consider the potential confounding effects of prior intelligence. One previous  
336 study that examined associations between education and brain structure at 73 years found that that  
337 the majority of associations observed between education and brain structure (cortical thickness in  
338 bilateral temporal, medial-frontal, parietal, sensory and motor cortices) attenuated to the null after  
339 accounting for childhood intelligence at age 11, and that neither education nor age 11 IQ was  
340 associated with total brain atrophy or tract-averaged fractional anisotropy<sup>43</sup>. A post-mortem study of  
341 130 elderly patients who had undergone cognitive assessment approximately 8 months before death  
342 also showed that, at any given level of brain pathology, higher education was associated with better  
343 cognitive function<sup>44</sup>. Higher educational attainment may lead to extrinsic compensation through

344 adaptations. Hence, more educated people will usually have occupations that are more intellectually  
345 demanding or have greater resources to partake in intellectual activities, resulting in greater  
346 cognitive stimulation and consistent with the “use it or lose it” hypothesis<sup>45</sup>. These compensatory  
347 mechanisms may confer protection against advancing AD pathology by increasing the time it takes  
348 for an individual to reach the threshold of cognitive impairment, whereby daily living is adversely  
349 affected, and a clinical AD diagnosis is made. In addition to compensatory mechanisms, higher  
350 education is also associated with avoidance of other potential downstream risk factors such as  
351 smoking and excessive alcohol consumption, as well as better engagement with health care systems  
352 surrounding primary and secondary prevention (e.g. uptake of and adherence to statin or anti-  
353 hypertensive medications).

#### 354 **Limitations**

355 There are a number of limitations to our study. Firstly, in two-sample MR, “winner’s curse” (i.e.  
356 where the effect sizes of variants identified within a single sample are likely to be larger than in the  
357 overall population, even if they are truly associated with the exposure) can bias causal estimates  
358 towards the null. However, we used SNPs identified in the meta-analysis of the discovery and  
359 replication samples of the educational attainment GWAS<sup>19</sup> making it unlikely that the estimate of the  
360 independent effect of education is biased to the null. Secondly, in the presence of weak instruments  
361 (i.e. SNPs that are not associated with the exposure at the genome-wide significance level), sample  
362 overlap in two-sample MR can bias estimates towards the confounded observational estimate<sup>46</sup>.  
363 There were no overlapping samples in the analysis of educational attainment and intelligence on AD  
364 risk, but there was considerable overlap in the samples used for the bidirectional educational  
365 attainment on intelligence analysis. Given that all instruments used in the analysis were strong  
366 (associated with the exposure at  $p < 5 \times 10^{-08}$ ), any bias should be minimal. Thirdly, it is currently not  
367 possible to estimate the F statistic (a measure of instrument strength) for multivariable MR in a two-  
368 or three-sample setting. Thus, we are unable to assess the conditional strength of our instruments  
369 for each exposure, once the SNP effect on the other exposure is taken into account<sup>13</sup>. Fourth, the

370 estimated effect of an exposure on an outcome, that are both associated with mortality, may be  
371 susceptible to survival bias.<sup>47</sup> For example, if individuals with lower educational attainment are more  
372 likely to die before the age of onset of AD, bias may occur because those individuals with a genetic  
373 predisposition for higher educational attainment are likely to live longer, thus having greater risk of  
374 being diagnosed with AD. This may induce a non-zero causal effect estimate even if no true  
375 biological association exists. In a previous study, we performed simulations to investigate whether  
376 our estimates of the effect of educational attainment on AD risk may be biased by survival and found  
377 no evidence to suggest this was the case<sup>5</sup>. Fifth, the phenotype used in the GWAS of intelligence was  
378 typically brief (a 2-minute, 13-item test) and heterogeneous. Thus, results may be different if a  
379 better phenotype of intelligence was available for GWAS studies. Finally, the educational attainment  
380 GWAS only assessed years of full-time academic training from primary education through to  
381 advanced qualifications (e.g. degree). Therefore, it remains unclear whether the same genetic  
382 variants would be associated with other aspects of education, such as completing vocational courses  
383 or completing part-time as opposed to full-time courses. It's also not clear whether education needs  
384 to be completed in a formal setting (such as school or college), or whether any form of learning (e.g.  
385 learning new skills 'on the job' such as in an apprenticeship during adolescence, or through career  
386 development and training courses as an adult in existing full-time employment) would confer the  
387 same degree of cognitive protection. This likely depends on the mechanism driving the association  
388 between education and AD, thus further studies to unpick the mechanisms may help to shed light on  
389 which forms of learning may confer cognitive benefits later in life and in turn, reduce AD risk.

## 390 **Conclusions**

391 Our findings imply that there is a bidirectional effect of intelligence on educational attainment and  
392 that the magnitude of effect is likely to be similar in both directions. There is robust evidence for an  
393 independent, causal effect of intelligence in reducing AD risk. The implications of this are uncertain,  
394 but it potentially increases support for a role of cognitive training interventions to improve various  
395 aspects of fluid intelligence. However, given that greater educational attainment also increases

396 intelligence, there is potentially also support for policies aimed at increasing length of schooling in  
397 order to lower incidence of AD.

## References

1. Statistics OfN. Deaths registered in England and Wales (Series DR): 2015, 2015.
2. Meng X, D'Arcy C. Education and Dementia in the Context of the Cognitive Reserve Hypothesis: A Systematic Review with Meta-Analyses and Qualitative Analyses. *PLOS ONE* 2012;7(6):e38268. doi: 10.1371/journal.pone.0038268
3. Sharp ES, Gatz M. Relationship between education and dementia: an updated systematic review. *Alzheimer Dis Assoc Disord* 2011;25(4):289-304. doi: 10.1097/WAD.0b013e318211c83c
4. Larsson SC, Traylor M, Malik R, et al. Modifiable pathways in Alzheimer's disease: Mendelian randomisation analysis. *BMJ* 2017;359:j5375. doi: 10.1136/bmj.j5375 [published Online First: 2017/12/08]
5. Anderson EL, Wade KH, Hemani G, et al. The Causal Effect Of Educational Attainment On Alzheimer's Disease: A Two-Sample Mendelian Randomization Study. *bioRxiv* 2017
6. Sewell WH, Shah VP. Socioeconomic Status, Intelligence, and the Attainment of Higher Education. *Sociology of Education* 1967;40(1):1-23. doi: 10.2307/2112184
7. Deary IJ, Johnson W. Intelligence and education: causal perceptions drive analytic processes and therefore conclusions. *Int J Epidemiol* 2010;39(5):1362-9. doi: 10.1093/ije/dyq072 [published Online First: 2010/05/28]
8. Deary IJ, Strand S, Smith P, et al. Intelligence and educational achievement. *Intelligence* 2007;35(1):13-21. doi: <https://doi.org/10.1016/j.intell.2006.02.001>
9. Richards M, Sacker A. Is education causal? Yes. *International Journal of Epidemiology* 2011;40(2):516-18. doi: 10.1093/ije/dyq166
10. Singh-Manoux A. Commentary: Is it time to redefine cognitive epidemiology? *International Journal of Epidemiology* 2010;39(5):1369-71. doi: 10.1093/ije/dyq123
11. Ritchie SJ, Tucker-Drob EM. How Much Does Education Improve Intelligence? A Meta-Analysis. *Psychol Sci* 2018;956797618774253. doi: 10.1177/0956797618774253 [published Online First: 2018/06/19]
12. Davey Smith G, Hemani G. Mendelian randomization: genetic anchors for causal inference in epidemiological studies. *Hum Mol Genet* 2014;23(R1):R89-98. doi: 10.1093/hmg/ddu328
13. Sanderson E, Davey Smith G, Windmeijer F, et al. An examination of multivariable Mendelian randomization in the single sample and two-sample summary data settings. *bioRxiv* 2018
14. Hemani G, Bowden J, Davey Smith G. Evaluating the potential role of pleiotropy in Mendelian randomization studies. *Hum Mol Genet* 2018 doi: 10.1093/hmg/ddy163 [published Online First: 2018/05/18]
15. Lawlor DA. Commentary: Two-sample Mendelian randomization: opportunities and challenges. *Int J Epidemiol* 2016;45(3):908-15. doi: 10.1093/ije/dyw127 [published Online First: 2016/07/19]
16. Bowden J, Davey Smith G, Burgess S. Mendelian randomization with invalid instruments: effect estimation and bias detection through Egger regression. *Int J Epidemiol* 2015;44(2):512-25. doi: 10.1093/ije/dyv080
17. Burgess S, Thompson SG. Multivariable Mendelian randomization: the use of pleiotropic genetic variants to estimate causal effects. *Am J Epidemiol* 2015;181(4):251-60. doi: 10.1093/aje/kwu283 [published Online First: 2015/01/30]
18. Burgess S, Dudbridge F, Thompson SG. Re: "Multivariable Mendelian randomization: the use of pleiotropic genetic variants to estimate causal effects". *Am J Epidemiol* 2015;181(4):290-1. doi: 10.1093/aje/kwv017 [published Online First: 2015/02/11]
19. Okbay A, Beauchamp JP, Fontana MA, et al. Genome-wide association study identifies 74 loci associated with educational attainment. *Nature* 2016;533(7604):539-42. doi: 10.1038/nature17671
20. Hill WD, Marioni RE, Maghzian O, et al. A combined analysis of genetically correlated traits identifies 187 loci and a role for neurogenesis and myelination in intelligence. *Mol Psychiatry* 2018 doi: 10.1038/s41380-017-0001-5 [published Online First: 2018/01/13]

21. Genomes Project C, Auton A, Brooks LD, et al. A global reference for human genetic variation. *Nature* 2015;526(7571):68-74. doi: 10.1038/nature15393 [published Online First: 2015/10/04]
22. Burgess S, Thompson SG, Collaboration CCG. Avoiding bias from weak instruments in Mendelian randomization studies. *Int J Epidemiol* 2011;40(3):755-64. doi: 10.1093/ije/dyr036 [published Online First: 2011/03/19]
23. Staiger D, Stock JH. Instrumental Variables Regression with Weak Instruments. *Econometrica* 1997;65(3):557-86. doi: 10.2307/2171753
24. Lambert JC, Ibrahim-Verbaas CA, Harold D, et al. Meta-analysis of 74,046 individuals identifies 11 new susceptibility loci for Alzheimer's disease. *Nat Genet* 2013;45(12):1452-8. doi: 10.1038/ng.2802
25. Bowden J, Davey Smith G, Haycock PC, et al. Consistent Estimation in Mendelian Randomization with Some Invalid Instruments Using a Weighted Median Estimator. *Genet Epidemiol* 2016;40(4):304-14. doi: 10.1002/gepi.21965
26. Burgess S, Thompson SG. Interpreting findings from Mendelian randomization using the MR-Egger method. *Eur J Epidemiol* 2017;32(5):377-89. doi: 10.1007/s10654-017-0255-x [published Online First: 2017/05/21]
27. Hemani G, Tilling K, Davey Smith G. Orienting the causal relationship between imprecisely measured traits using GWAS summary data. *PLoS Genet* 2017;13(11):e1007081. doi: 10.1371/journal.pgen.1007081 [published Online First: 2017/11/18]
28. Rees JMB, Wood AM, Burgess S. Extending the MR-Egger method for multivariable Mendelian randomization to correct for both measured and unmeasured pleiotropy. *Stat Med* 2017;36(29):4705-18. doi: 10.1002/sim.7492 [published Online First: 2017/09/30]
29. Stone M. Cross-validated choice and assessment of statistical predictions. *J R Stat Soc B* 1974;36:111-47.
30. J. Ceci S. How much does schooling influence general intelligence and its cognitive components? A reassessment of the evidence 1991.
31. Driemeyer J, Boyke J, Gaser C, et al. Changes in gray matter induced by learning--revisited. *PLoS One* 2008;3(7):e2669. doi: 10.1371/journal.pone.0002669 [published Online First: 2008/07/24]
32. Koch K, Reess TJ, Rus OG, et al. Extensive learning is associated with gray matter changes in the right hippocampus. *Neuroimage* 2016;125:627-32. doi: 10.1016/j.neuroimage.2015.10.056 [published Online First: 2015/11/01]
33. Scholz J, Klein MC, Behrens TE, et al. Training induces changes in white-matter architecture. *Nat Neurosci* 2009;12(11):1370-1. doi: 10.1038/nn.2412 [published Online First: 2009/10/13]
34. Carreiras M, Seghier ML, Baquero S, et al. An anatomical signature for literacy. *Nature* 2009;461(7266):983-6. doi: 10.1038/nature08461 [published Online First: 2009/10/16]
35. Ritchie SJ, Bates TC, Der G, et al. Education is associated with higher later life IQ scores, but not with faster cognitive processing speed. *Psychol Aging* 2013;28(2):515-21. doi: 10.1037/a0030820 [published Online First: 2013/01/02]
36. Richards M, Power C, Sacker A. Paths to literacy and numeracy problems: evidence from two British birth cohorts. *J Epidemiol Community Health* 2009;63(3):239-44. doi: 10.1136/jech.2007.064923 [published Online First: 2008/08/23]
37. Deary IJ, Spinath FM, Bates TC. Genetics of intelligence. *Eur J Hum Genet* 2006;14(6):690-700. doi: 10.1038/sj.ejhg.5201588 [published Online First: 2006/05/25]
38. Johnson W, Deary IJ, Silventoinen K, et al. Family Background Buys an Education in Minnesota but Not in Sweden. *Psychological Science* 2010;21(9):1266-73. doi: 10.1177/0956797610379233
39. Stern Y. Cognitive reserve in ageing and Alzheimer's disease. *Lancet Neurol* 2012;11(11):1006-12. doi: 10.1016/S1474-4422(12)70191-6
40. Liu Y, Julkunen V, Pajananen T, et al. Education increases reserve against Alzheimer's disease--evidence from structural MRI analysis. *Neuroradiology* 2012;54(9):929-38. doi: 10.1007/s00234-012-1005-0

41. Coffey CE, Saxton JA, Ratcliff G, et al. Relation of education to brain size in normal aging: implications for the reserve hypothesis. *Neurology* 1999;53(1):189-96.
42. Sole-Padullés C, Bartres-Faz D, Junque C, et al. Brain structure and function related to cognitive reserve variables in normal aging, mild cognitive impairment and Alzheimer's disease. *Neurobiol Aging* 2009;30(7):1114-24. doi: 10.1016/j.neurobiolaging.2007.10.008
43. Cox SR, Dickie DA, Ritchie SJ, et al. Associations between education and brain structure at age 73 years, adjusted for age 11 IQ. *Neurology* 2016;87(17):1820-26. doi: 10.1212/WNL.0000000000003247 [published Online First: 2016/10/26]
44. Bennett DA, Wilson RS, Schneider JA, et al. Education modifies the relation of AD pathology to level of cognitive function in older persons. *Neurology* 2003;60(12):1909-15.
45. Whalley LJ, Dick FD, McNeill G. A life-course approach to the aetiology of late-onset dementias. *Lancet Neurol* 2006;5(1):87-96. doi: 10.1016/S1474-4422(05)70286-6
46. Burgess S, Davies NM, Thompson SG. Bias due to participant overlap in two-sample Mendelian randomization. *Genet Epidemiol* 2016;40(7):597-608. doi: 10.1002/gepi.21998
47. Hernan MA, Alonso A, Logroscino G. Cigarette smoking and dementia: potential selection bias in the elderly. *Epidemiology* 2008;19(3):448-50. doi: 10.1097/EDE.0b013e31816bbe14



**Competing interests:** The authors have no competing interests to disclose. All authors have completed the ICMJE uniform disclosure form at [www.icmje.org/coi\\_disclosure.pdf](http://www.icmje.org/coi_disclosure.pdf) and declare: no support from any organisation for the submitted work; no financial relationships with any organisations that might have an interest in the submitted work in the previous three years; no other relationships or activities that could appear to have influenced the submitted work.

#### **Funding statement**

This work was supported by a grant from the UK Economic and Social Research Council (ES/M010317/1) and a grant from the BRACE Alzheimer's charity (BR16/028). Research reported in this publication was supported by the National Institute on Aging of the National Institutes of Health under Award No. R01AG048835. LDH and ELA are supported by fellowships from the UK Medical Research Council (MR/M020894/1 and MR/P014437/1, respectively). The Economics and Social Research Council (ESRC) support NMD via a Future Research Leaders grant [ES/N000757/1]. GH is supported by the Wellcome Trust and the Royal Society [208806/Z/17/Z]. ELA, KHW, RKL, GH, LDH, JB, GDS and ES work in a unit that receives funding from the University of Bristol and the UK Medical Research Council (MC\_UU\_00011/1). KHW is funded by the Wellcome Trust Investigator Award (202802/Z/16/Z, Principal Investigator: Professor Nicholas J Timpson). The content is solely the responsibility of the authors and does not necessarily represent the official views of any of the funders.

**Author contribution statement:** ELA, NMD and GH conceptualised the study. ELA completed all statistical analyses with guidance from GH, NMD, LDH and KHW. ELA drafted the first version of the manuscript. All authors provided critical comments on the manuscript. ELA is the guarantor and accepts full responsibility for the work and/or the conduct of the study, had access to the data, and controlled the decision to publish. The corresponding author attests that all listed authors meet authorship criteria and that no others meeting the criteria have been omitted.

**Copyright/Licence for publication:** The Corresponding Author has the right to grant on behalf of all authors and does grant on behalf of all authors, a worldwide licence to the Publishers and its licensees in perpetuity, in all forms, formats and media (whether known now or created in the future), to i) publish, reproduce, distribute, display and store the Contribution, ii) translate the Contribution into other languages, create adaptations, reprints, include within collections and create summaries, extracts and/or, abstracts of the Contribution, iii) create any other derivative work(s) based on the Contribution, iv) to exploit all subsidiary rights in the Contribution, v) the inclusion of electronic links from the Contribution to third party material where-ever it may be located; and, vi) licence any third party to do any or all of the above.

**Keywords:** Education; Dementia; Alzheimer's disease; Mendelian Randomization
